# Supplementary material
Source: publisher figshare collection journal article supplement (https://geolsoc.figshare.com/articles/dataset/_/3453308)

HPD 1150

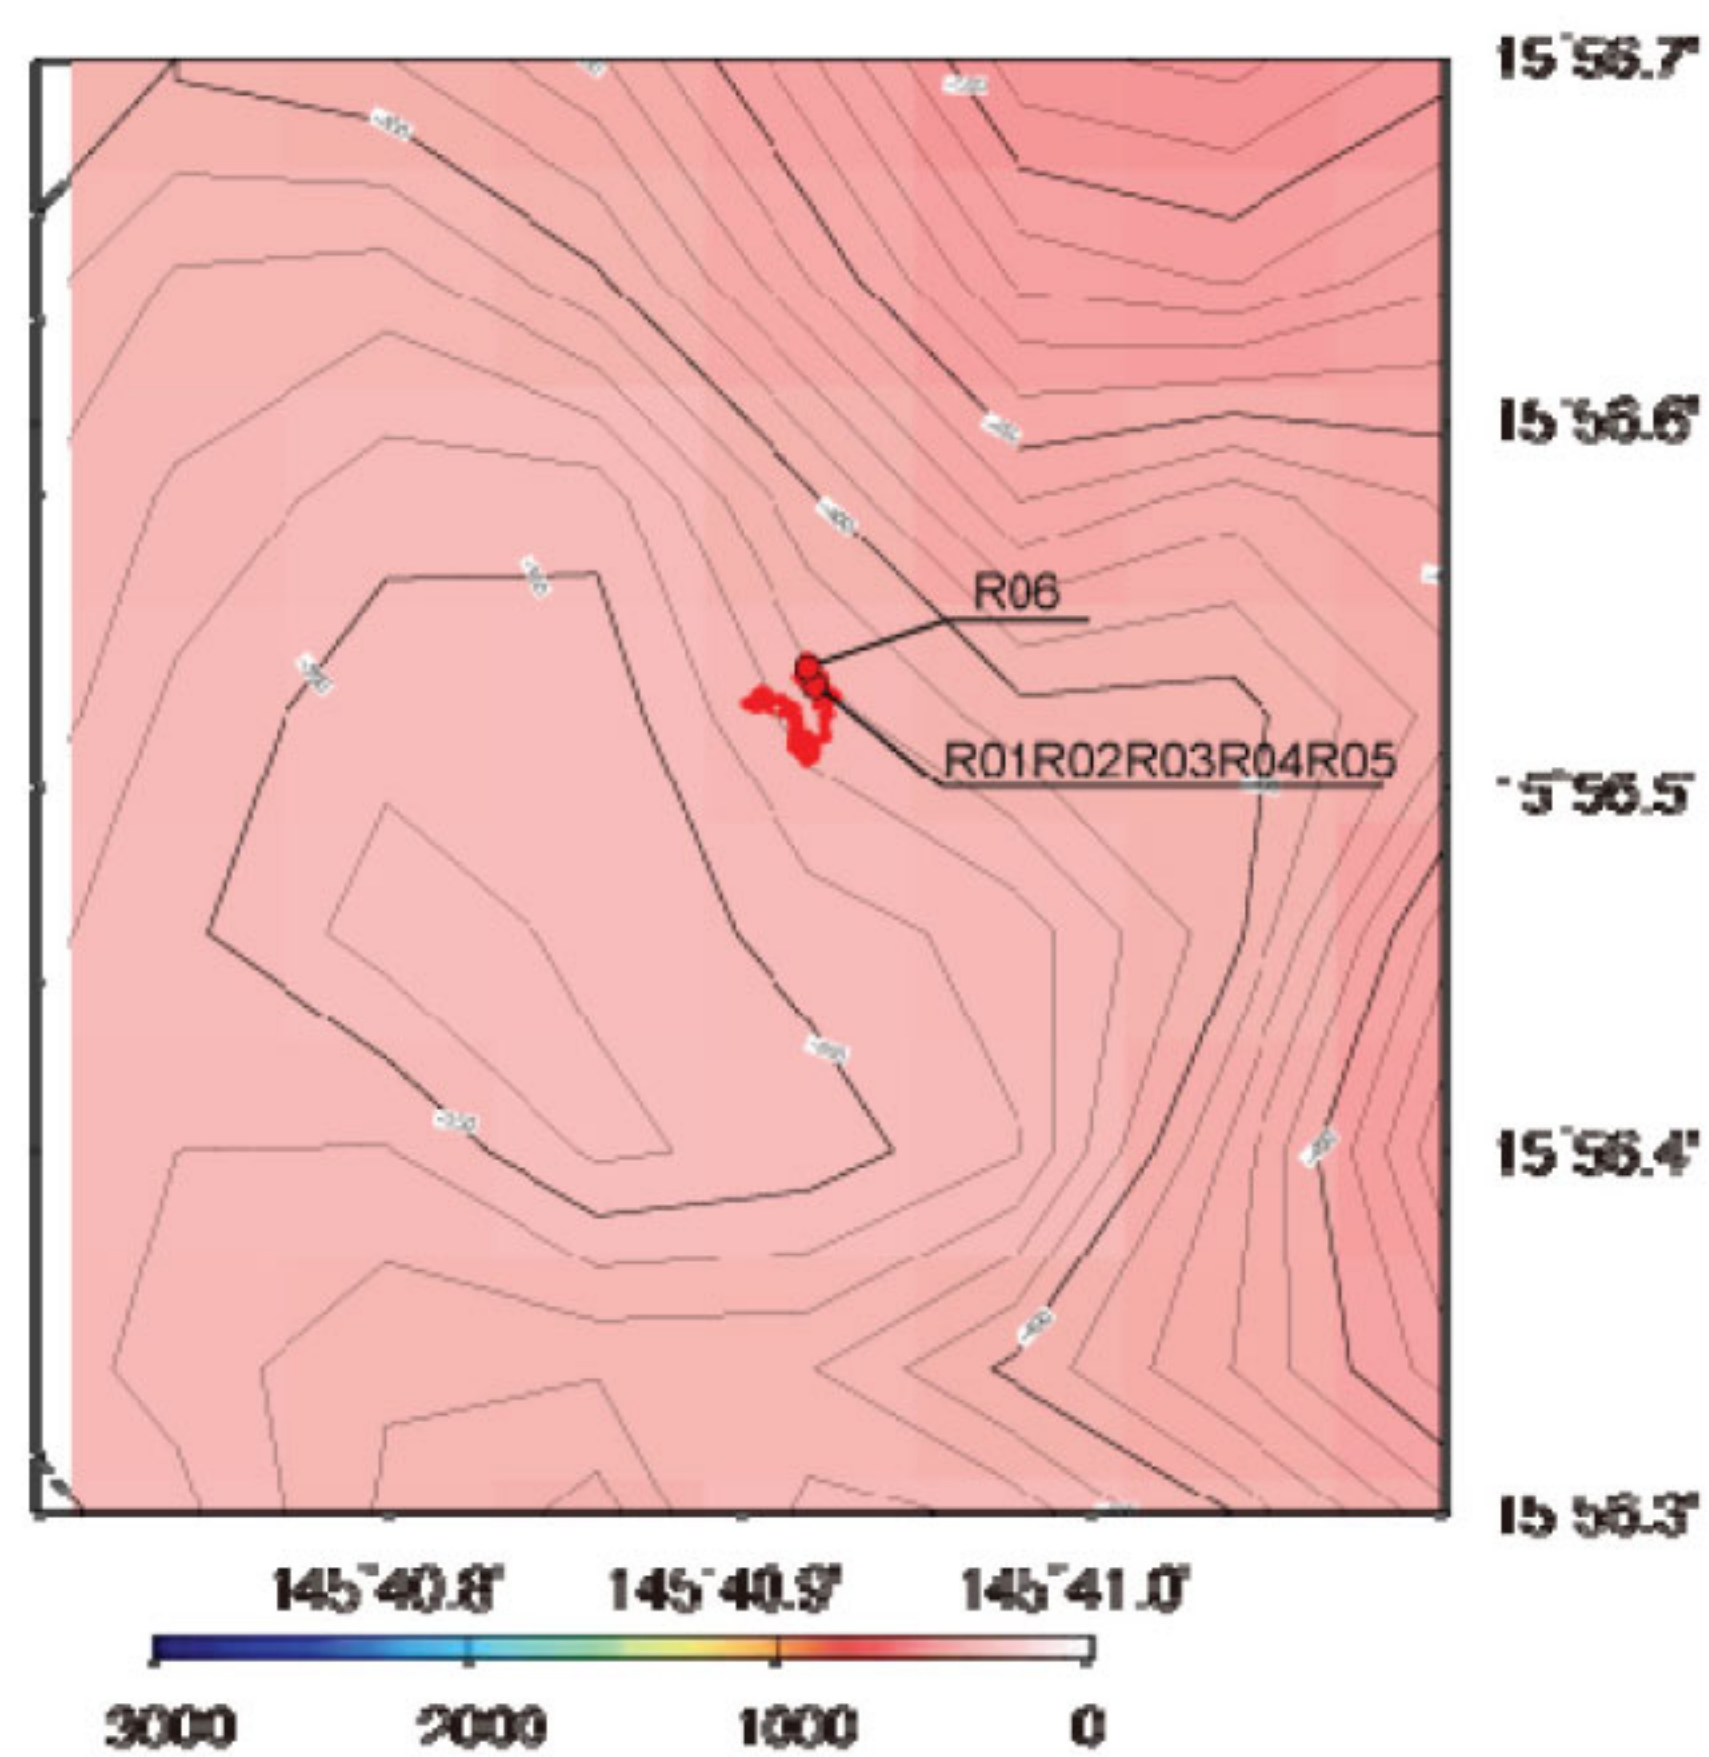

HPD 1151

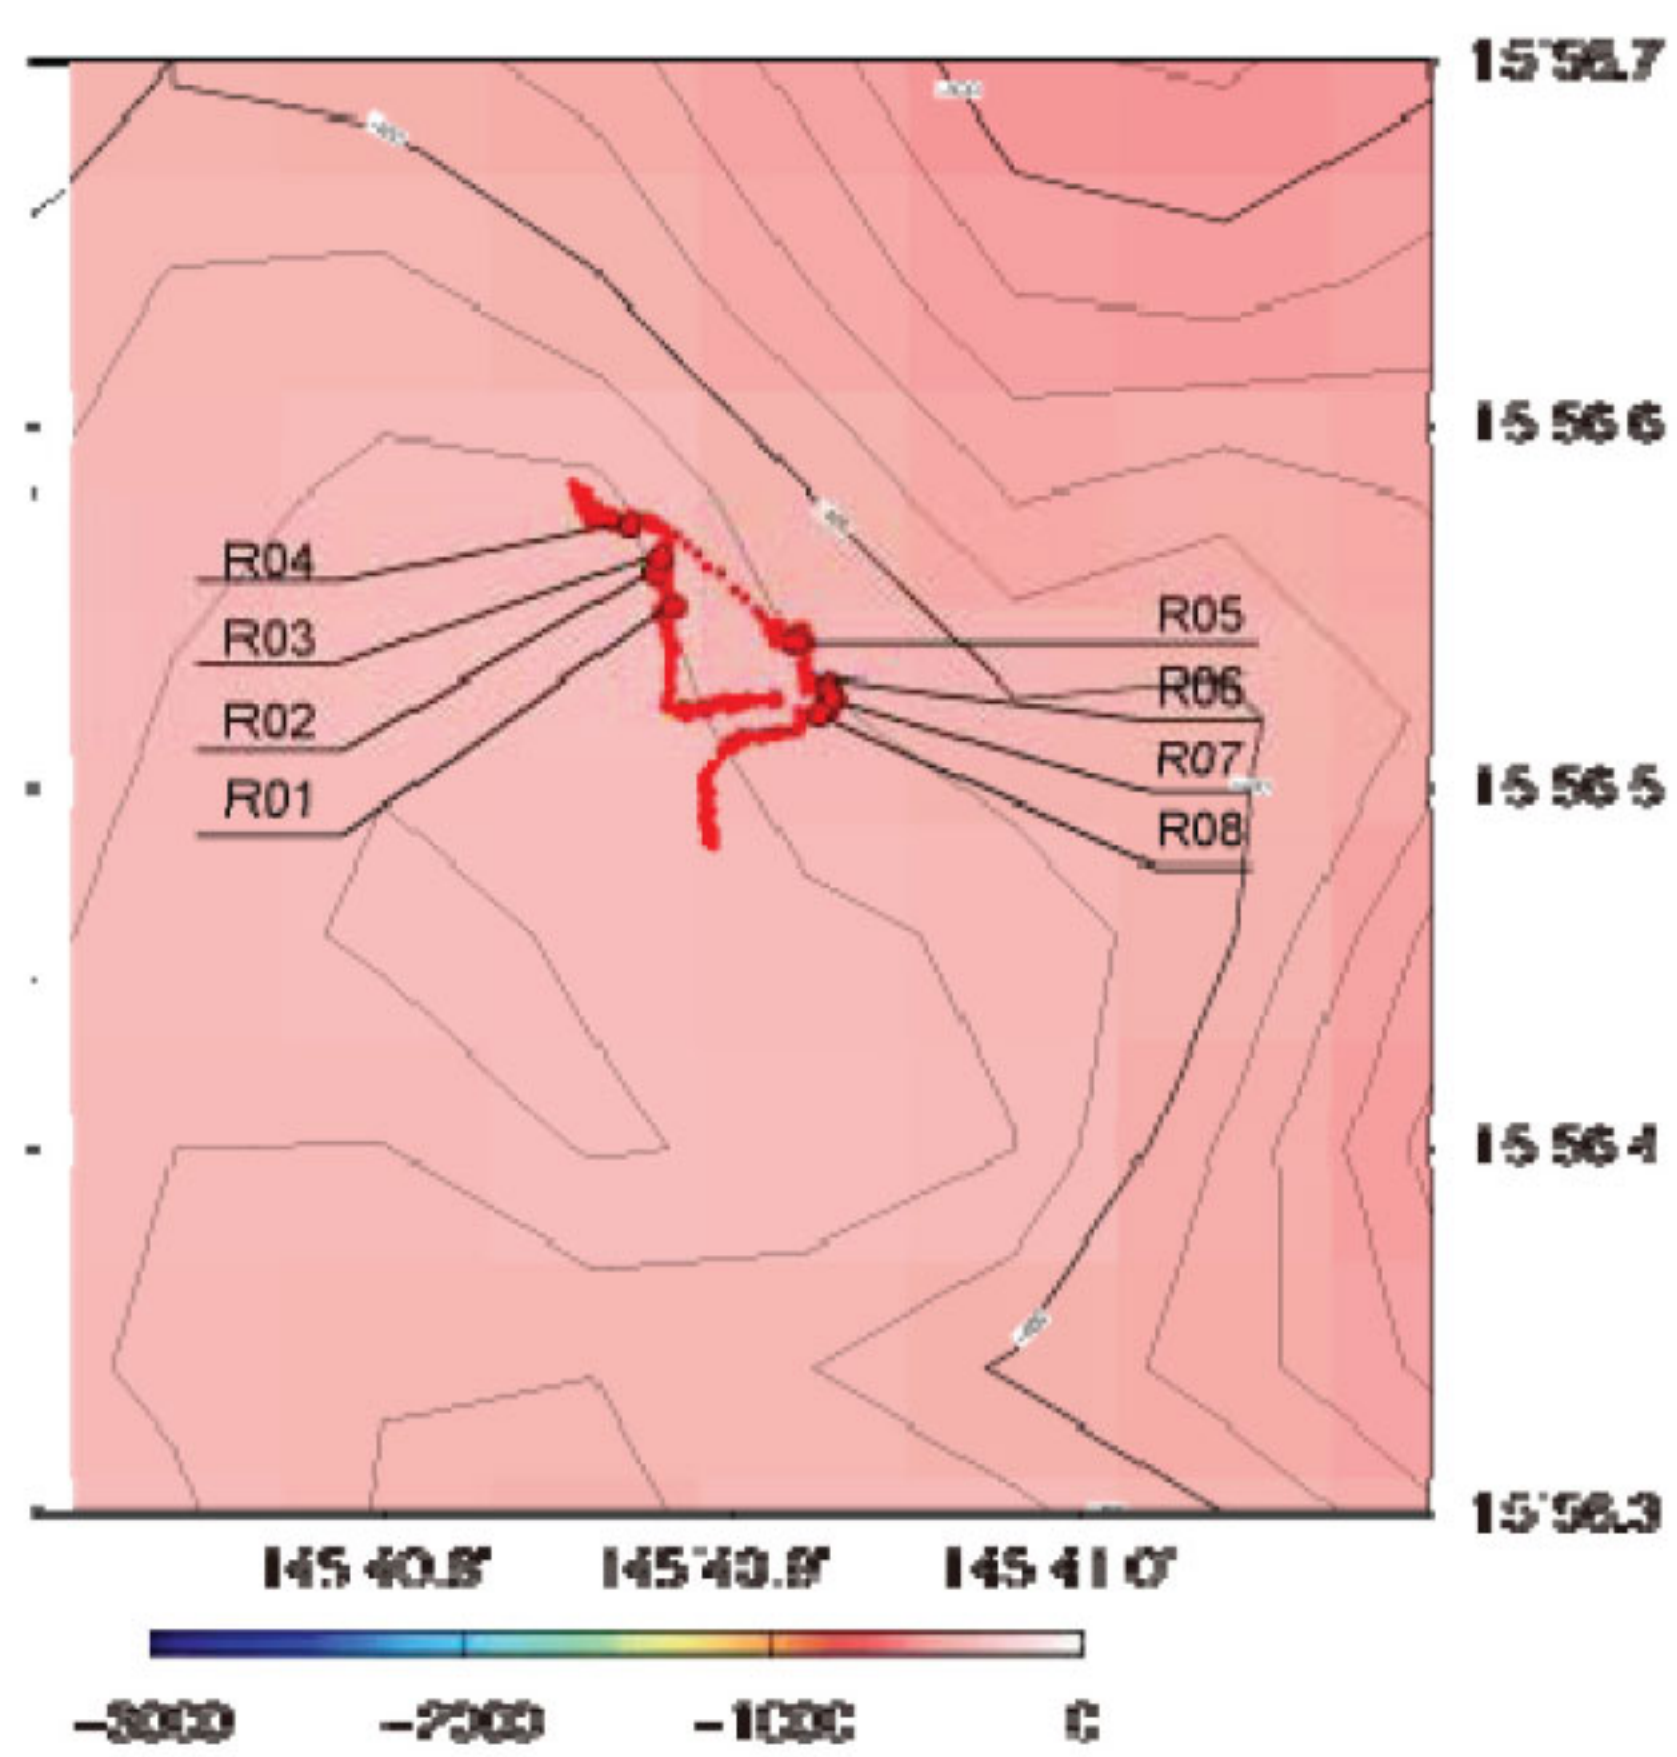

HPD 1152

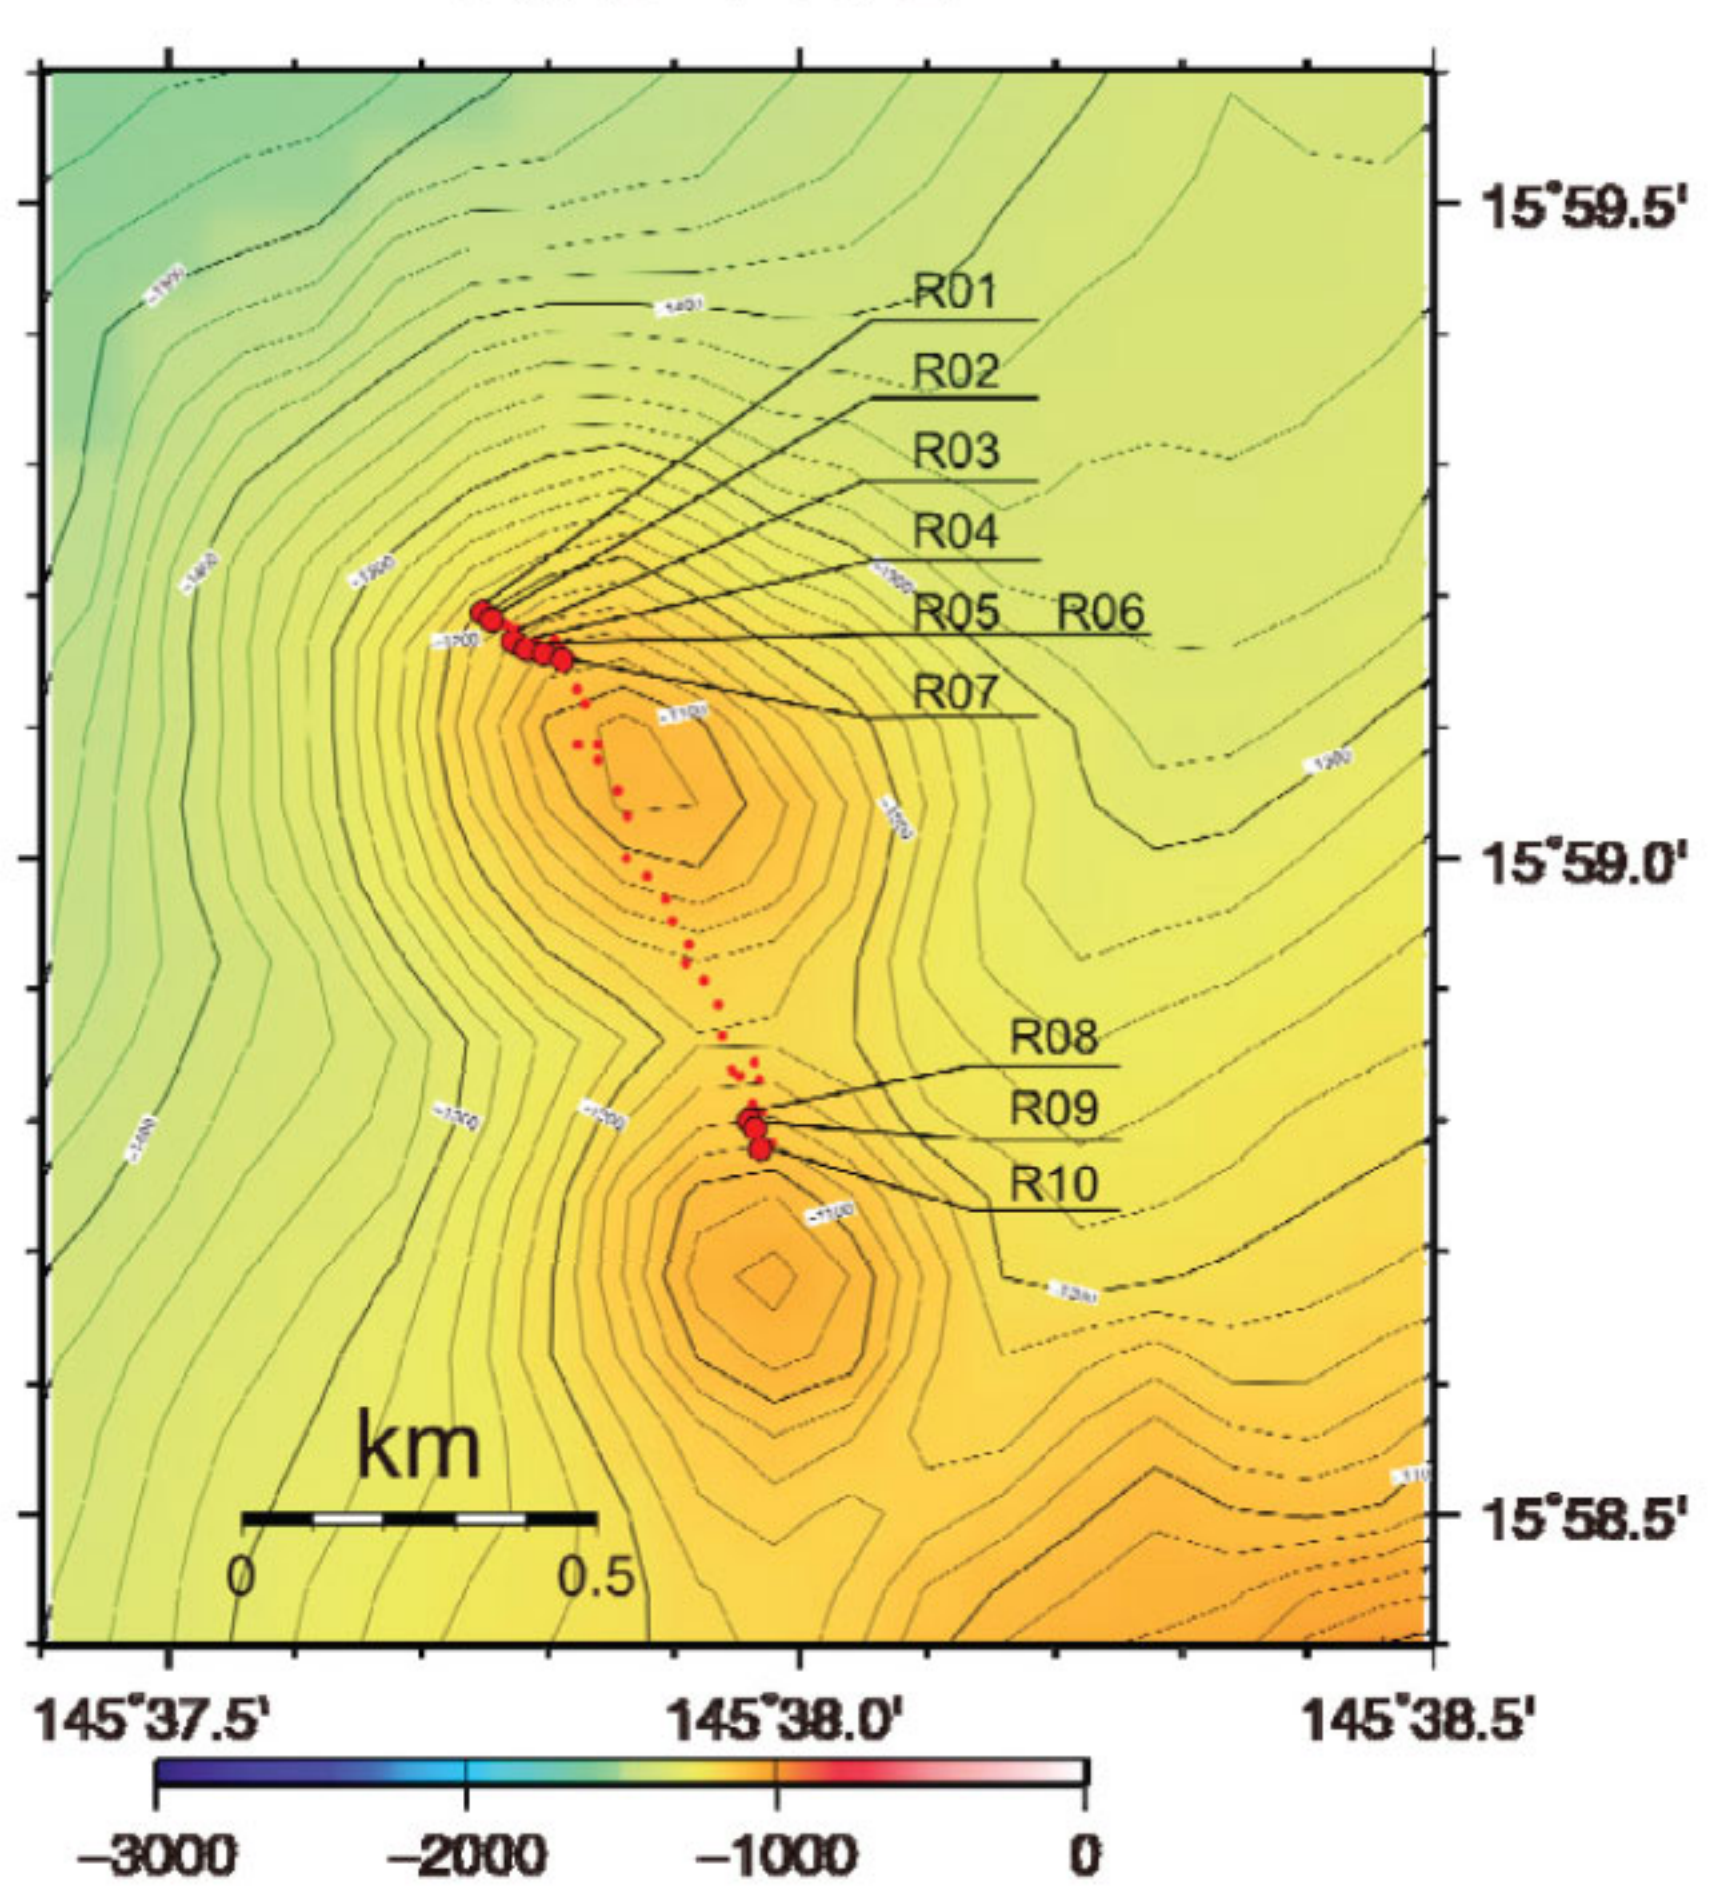

HPD 1153

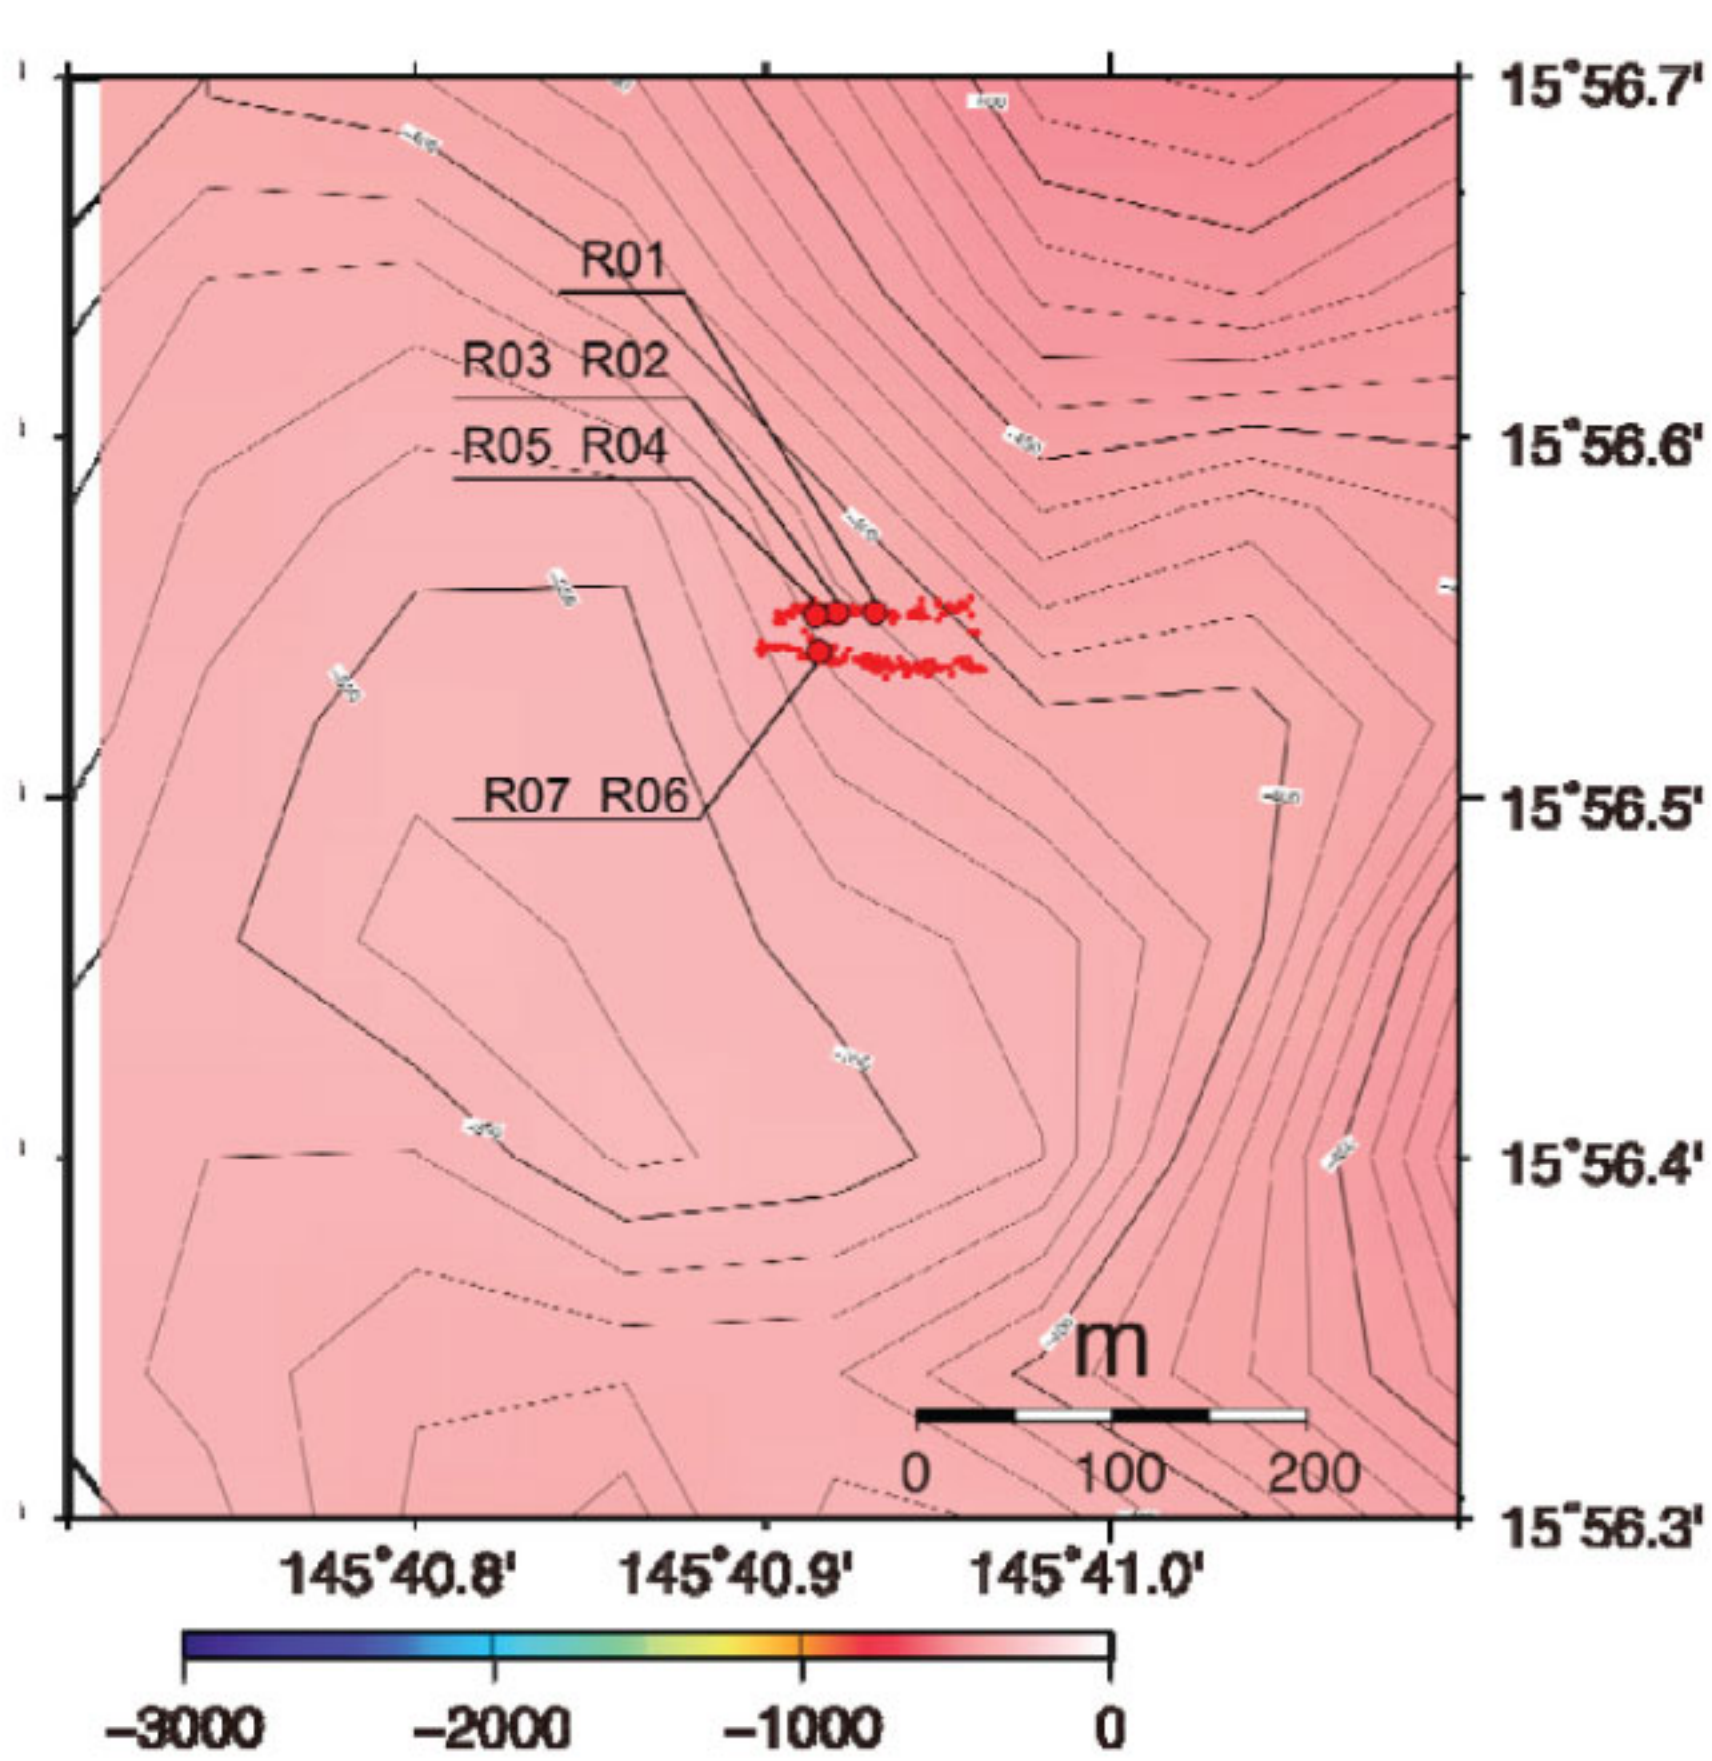

Fig A1c

Supplement: Supplementary file 1 [file 1]

# HPD 1015

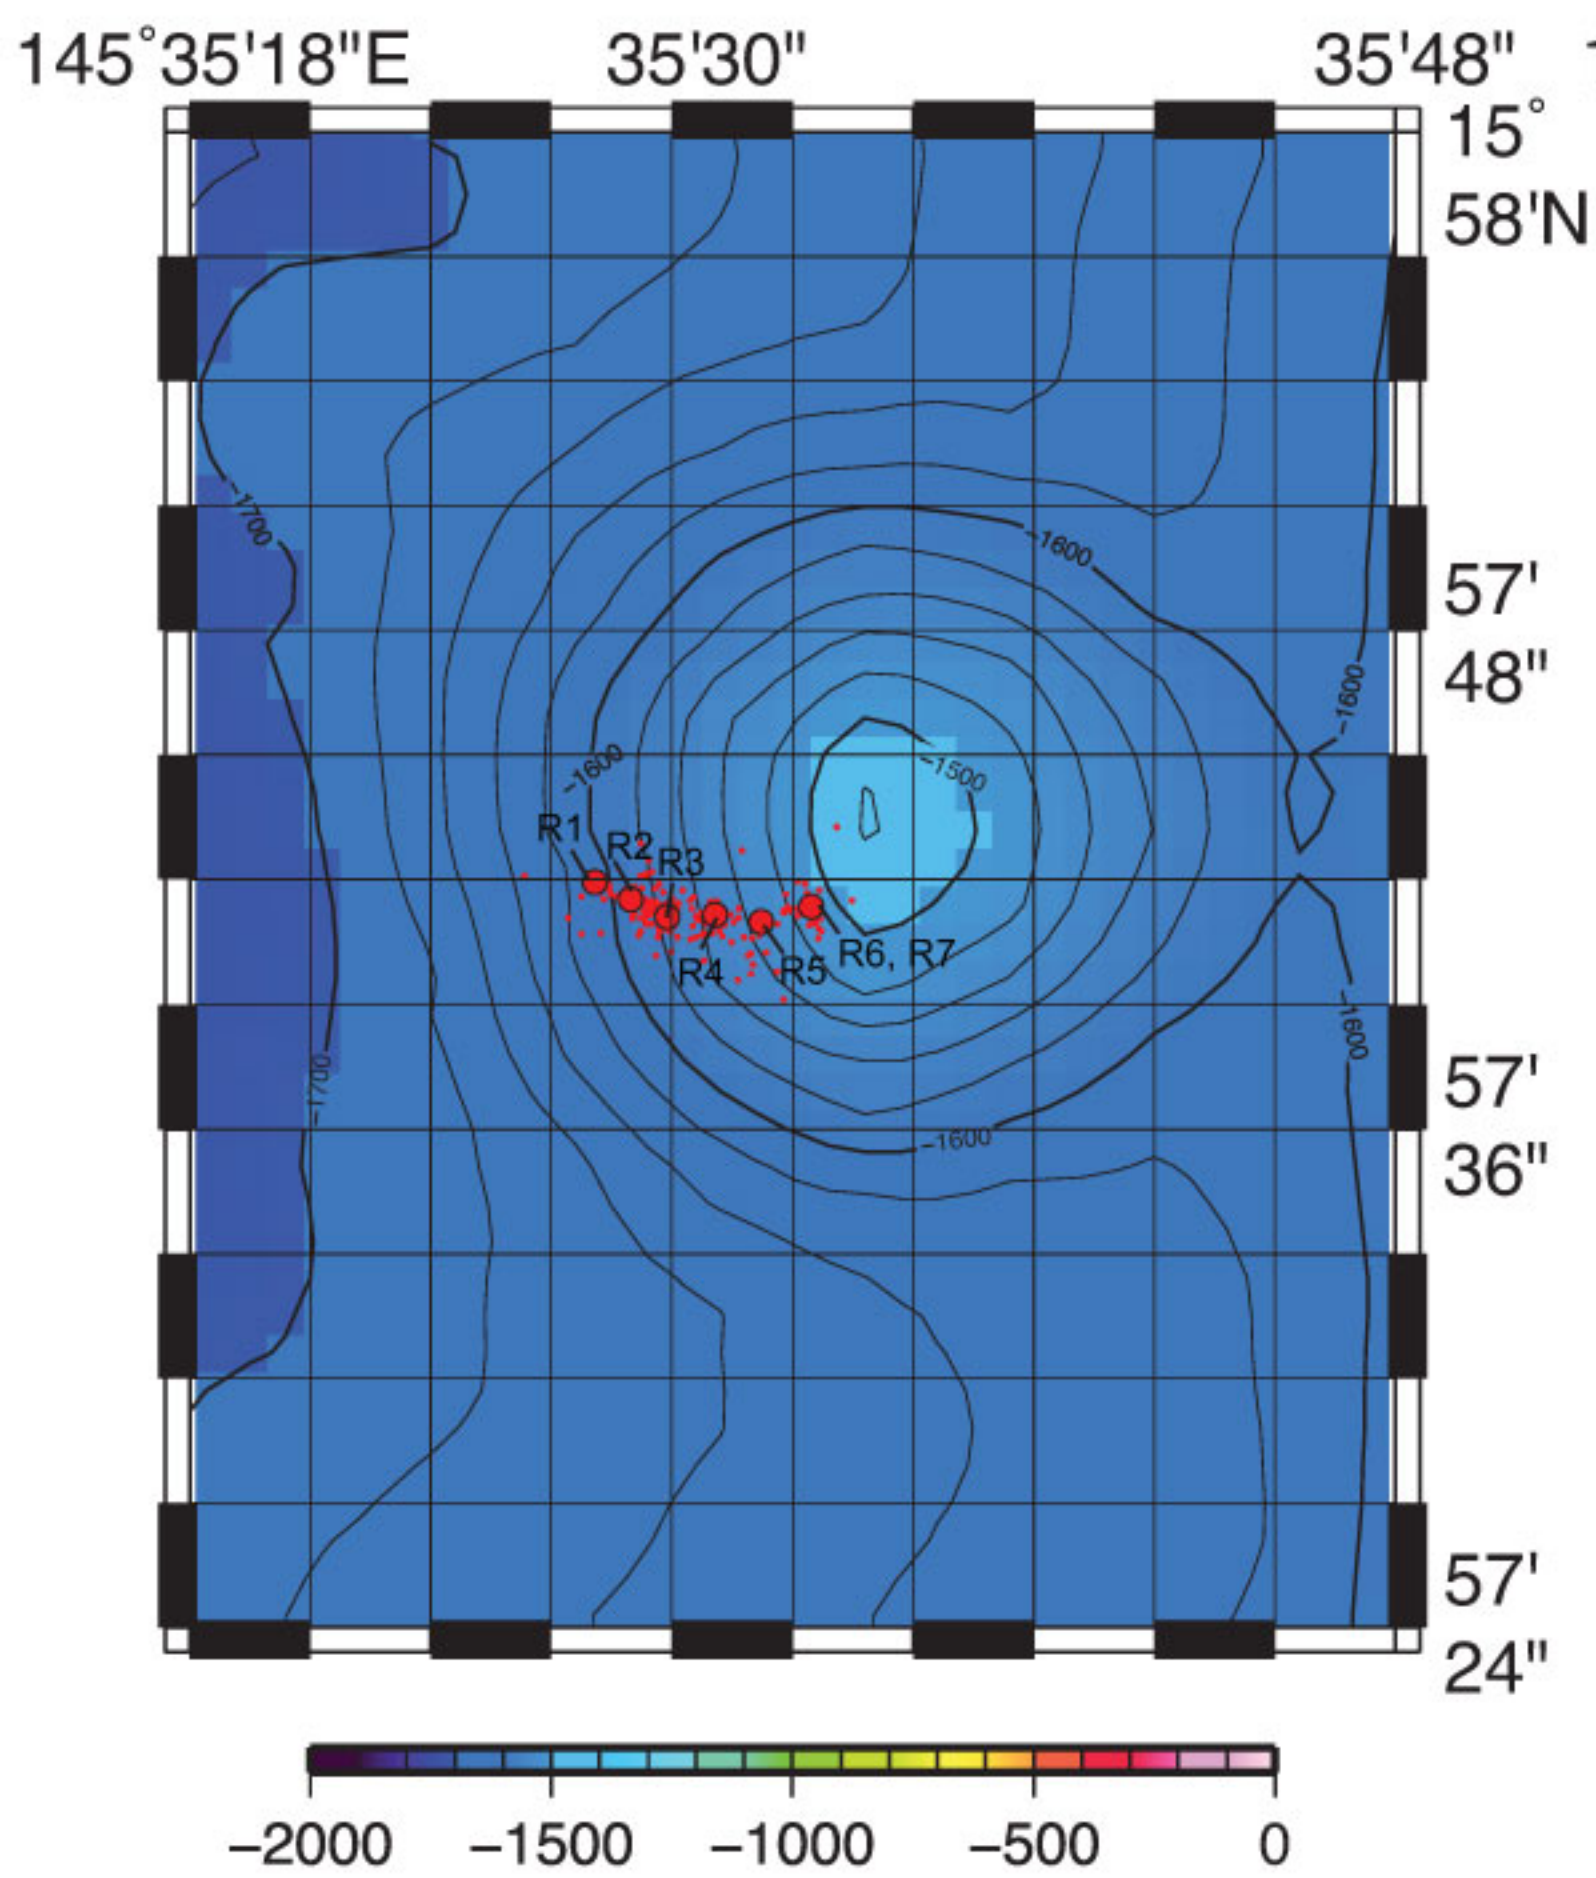

# HPD 1016

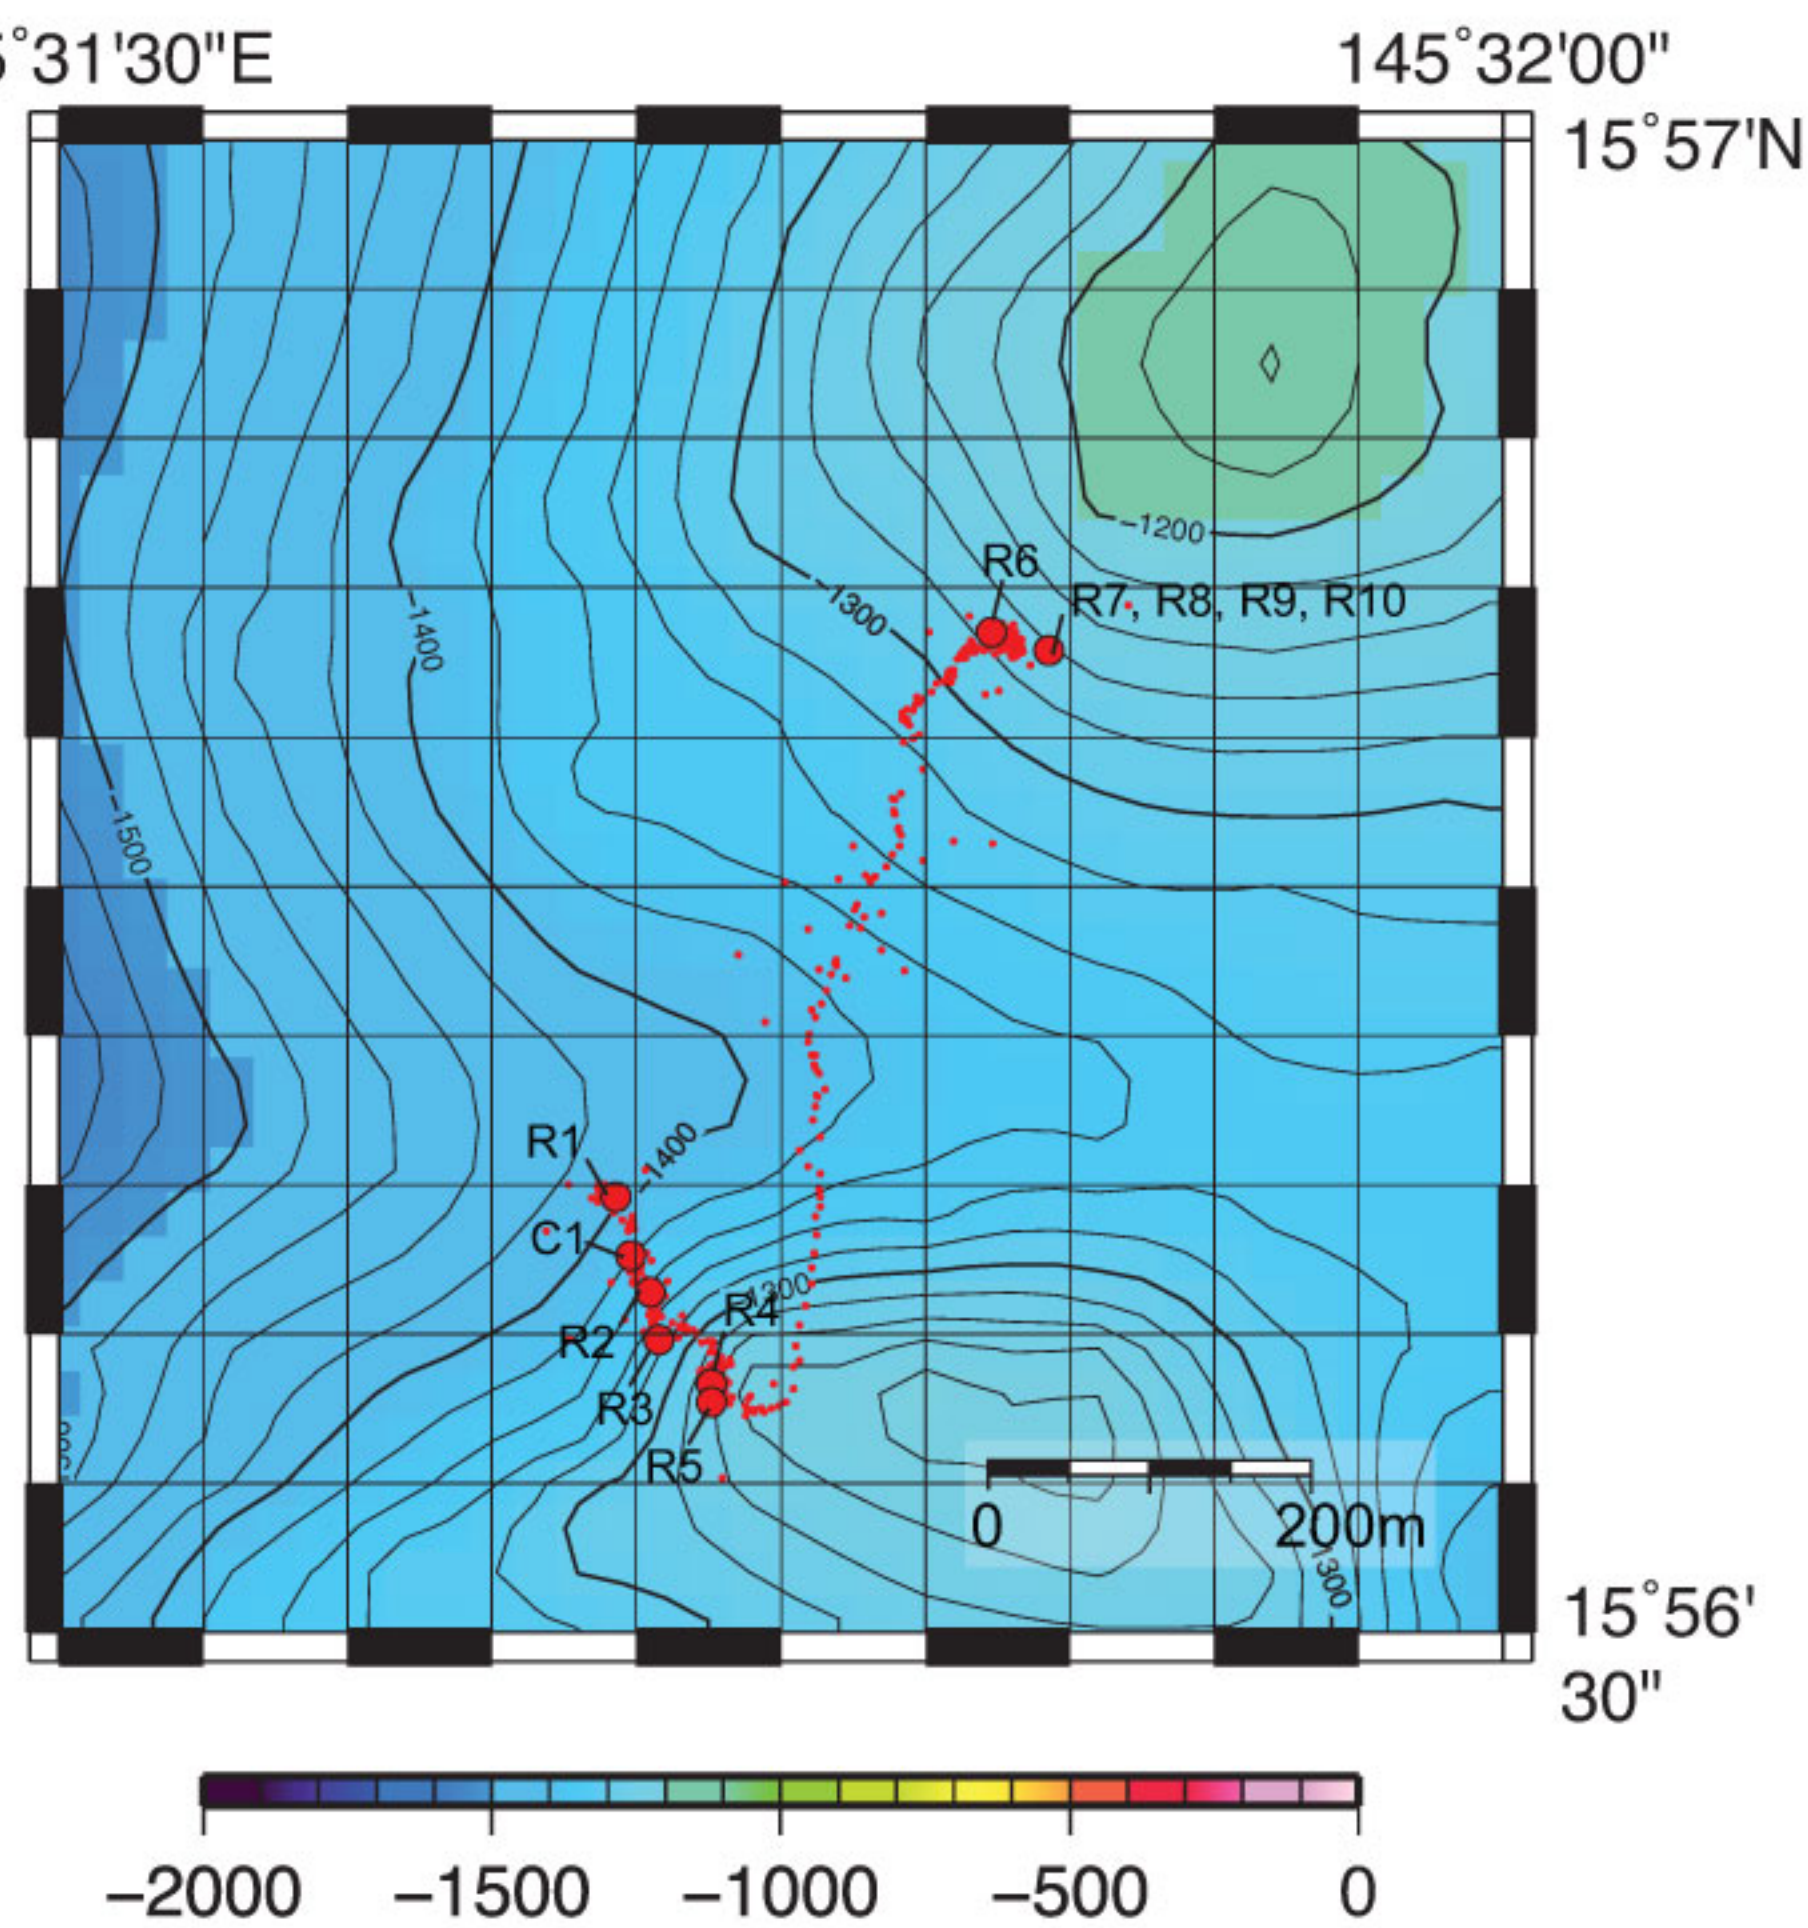

# HPD 1017

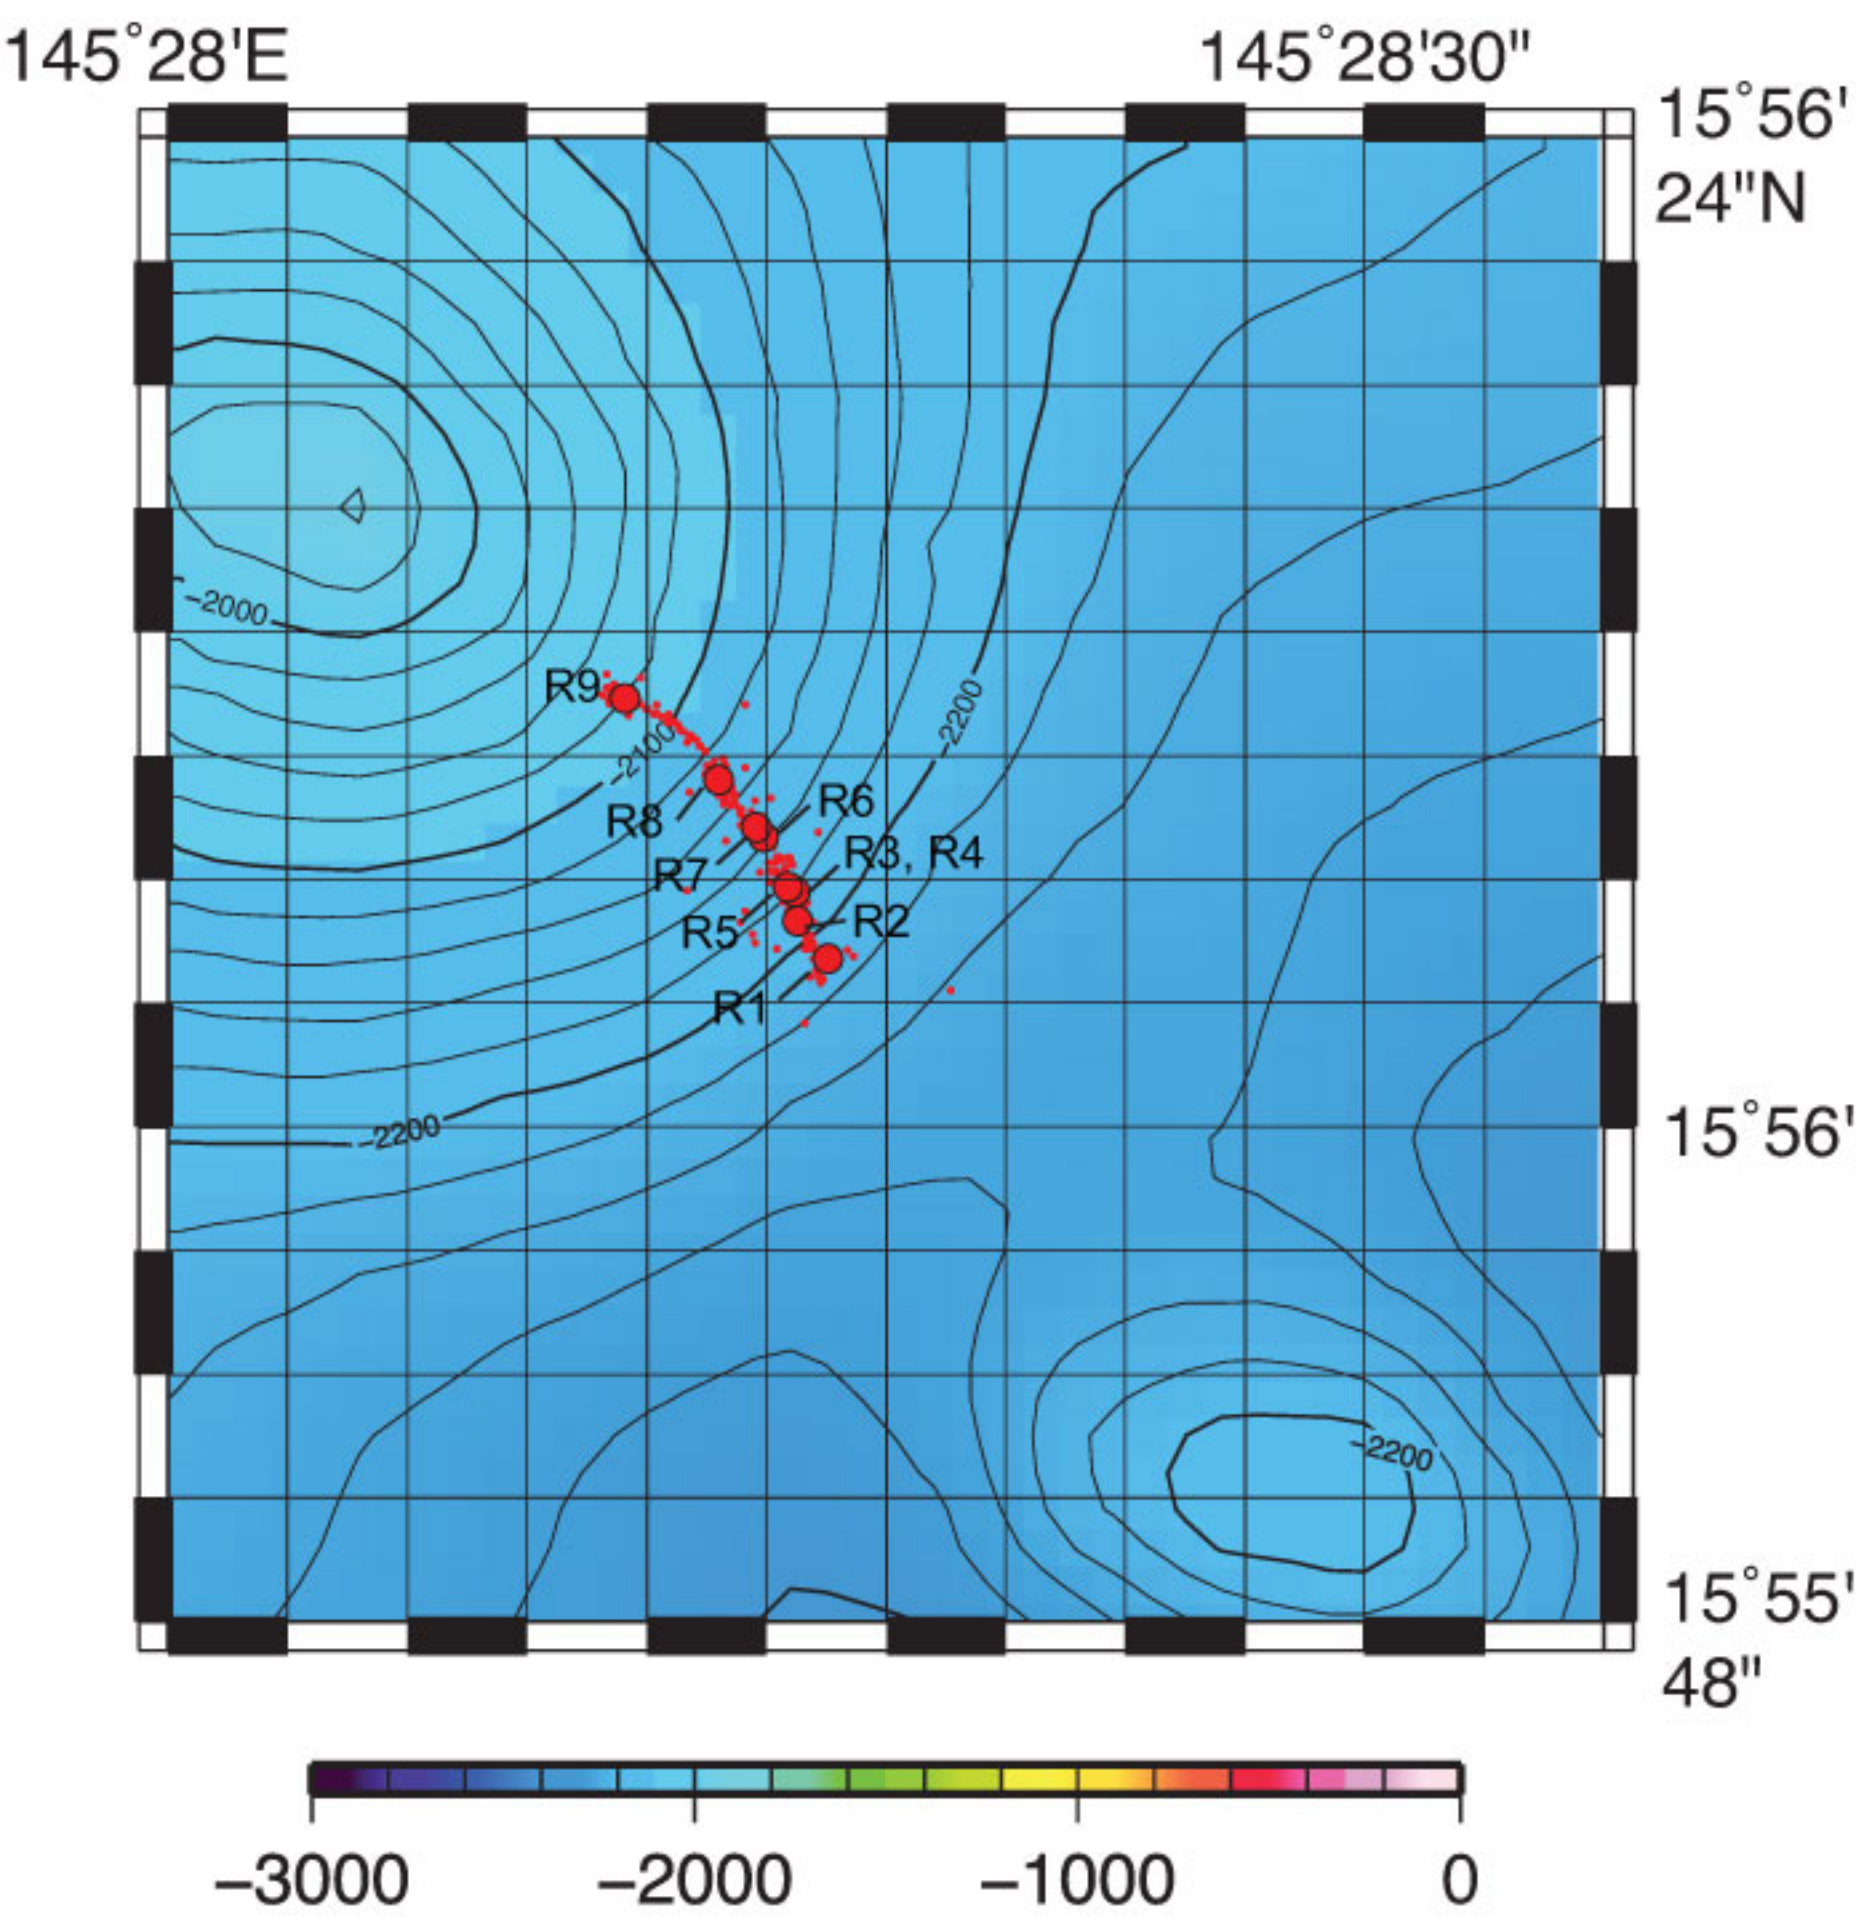

# HPD 1018

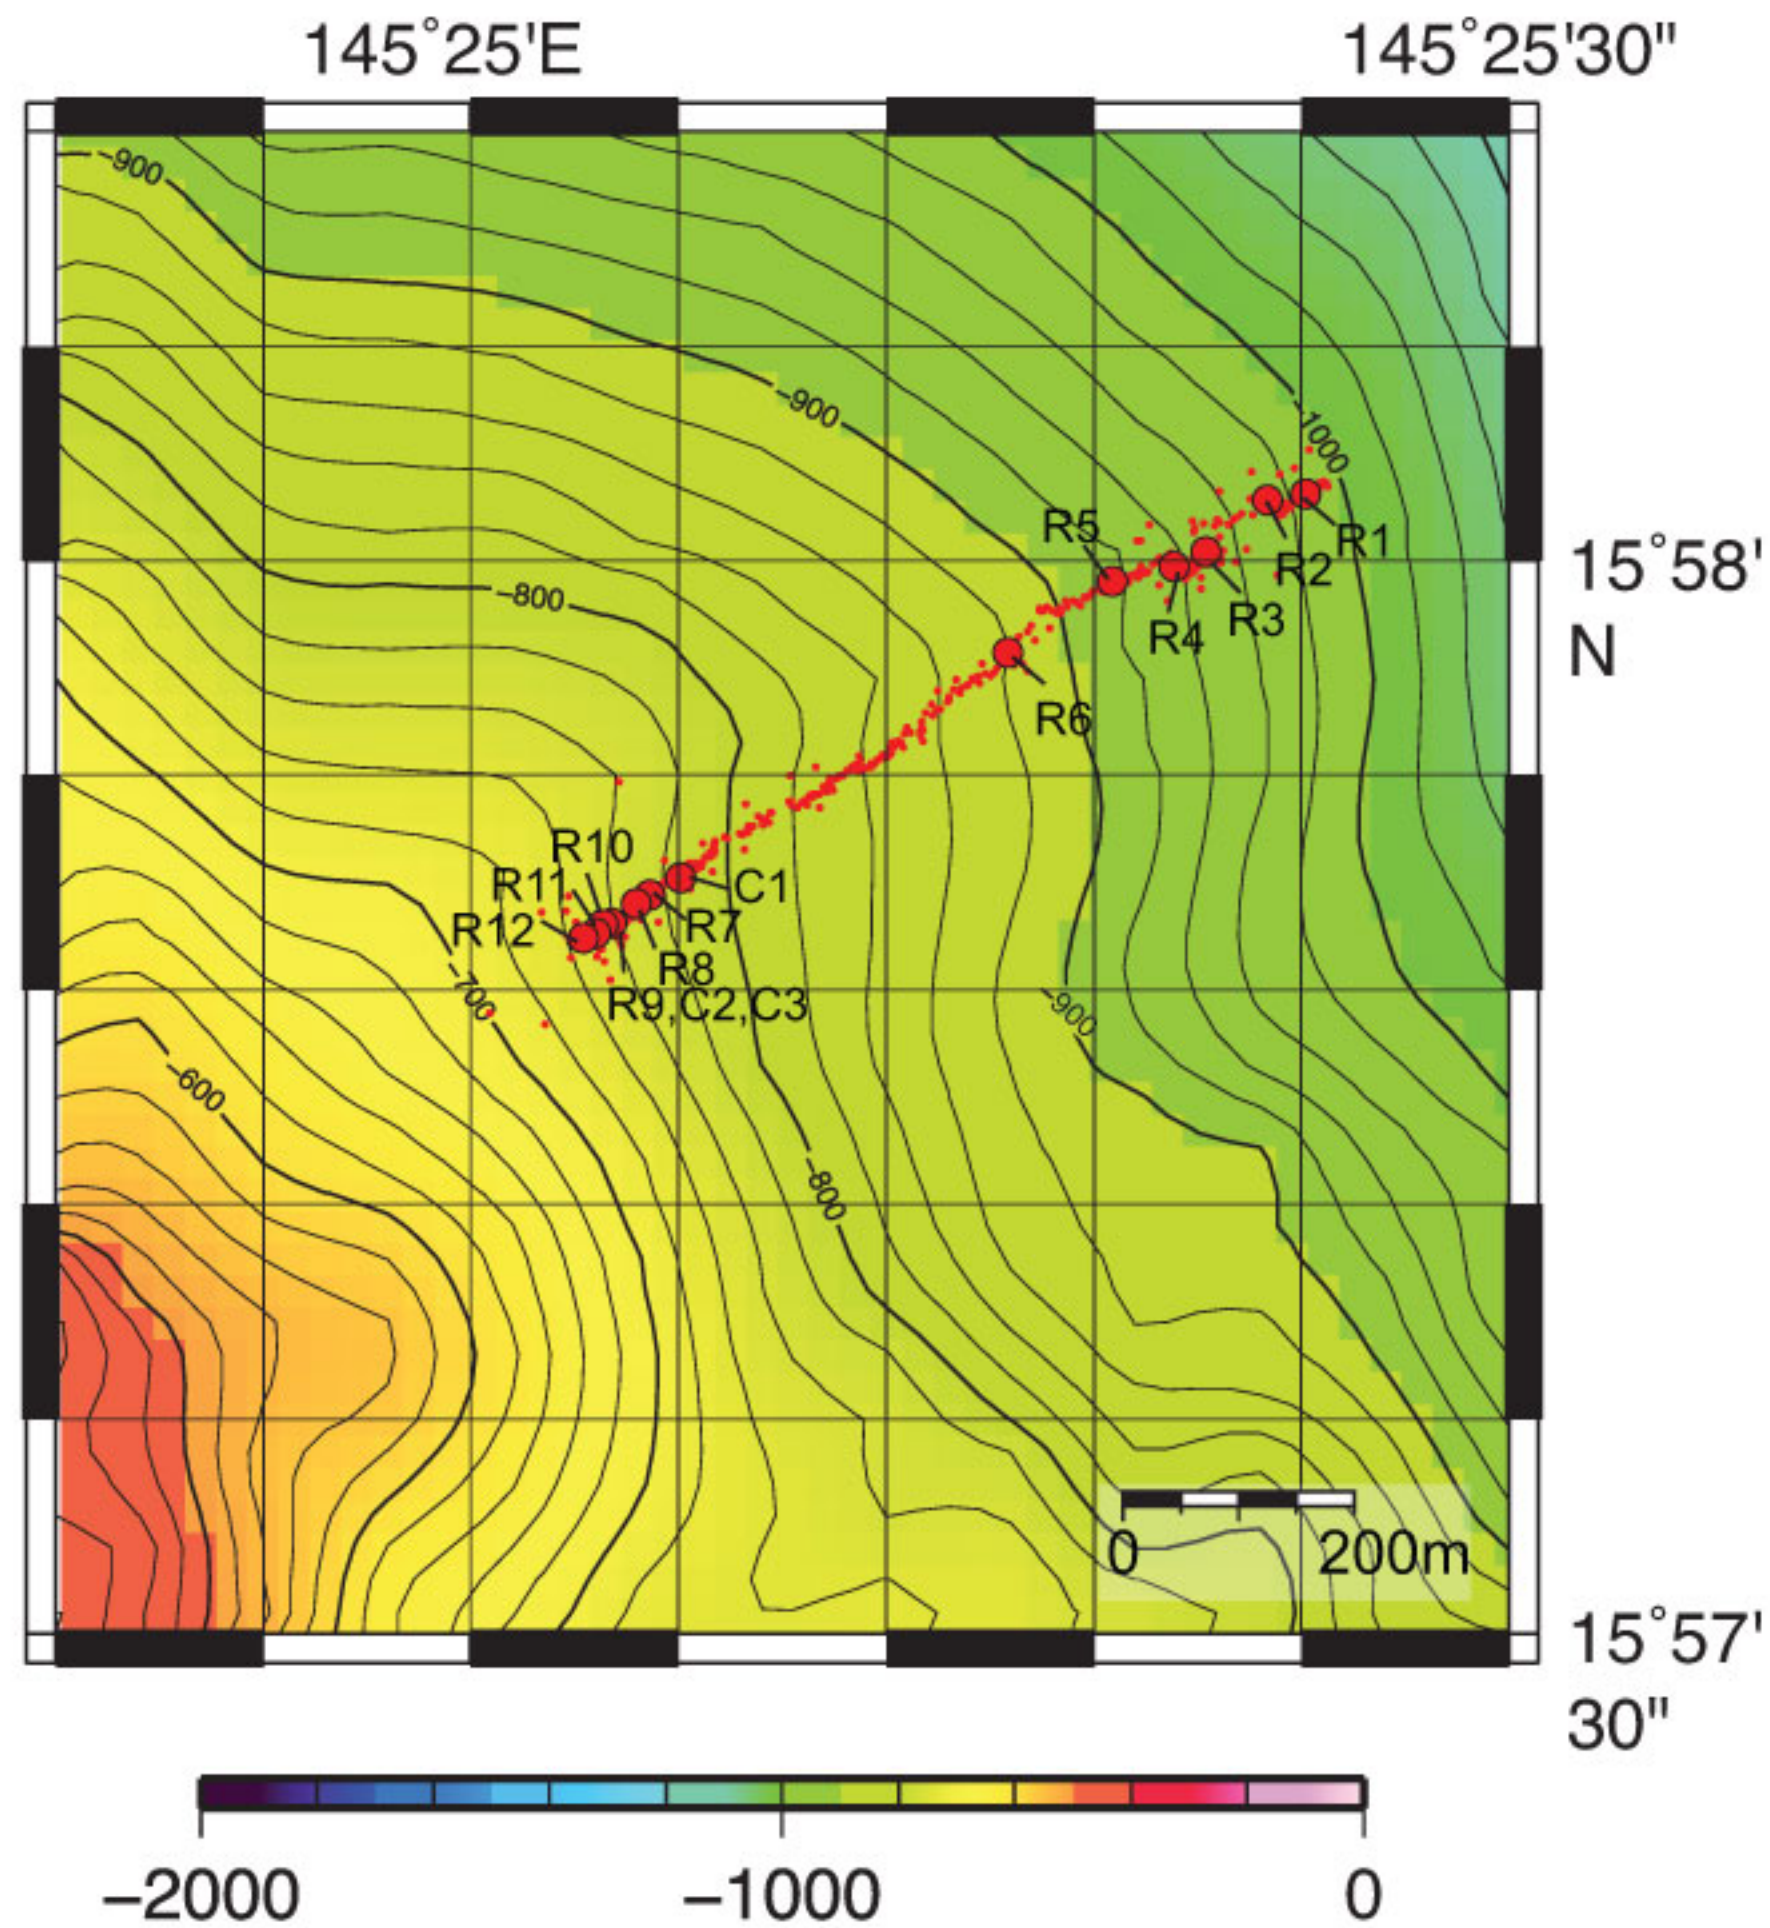

Fig. A1B

Supplement: Supplementary file 2 [file 1]

# HPD 1011

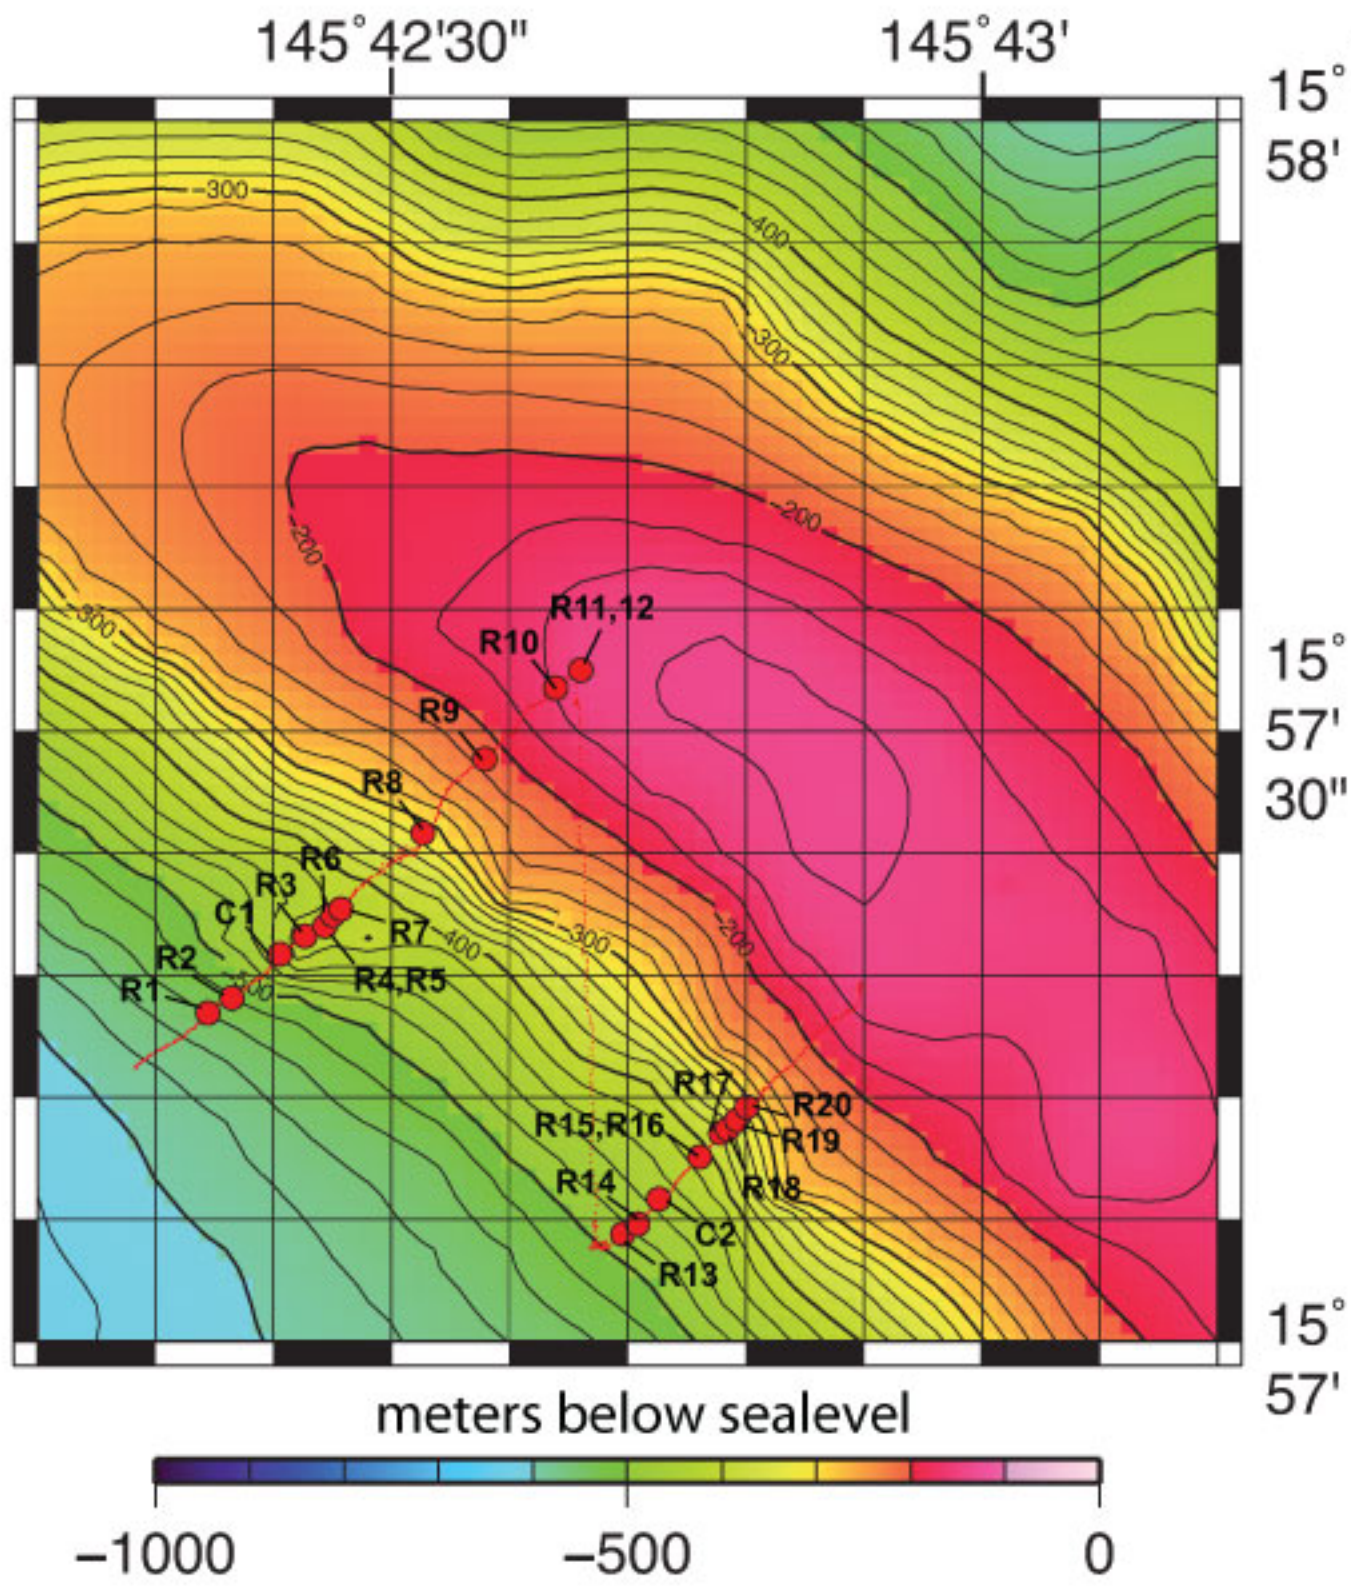

# HPD 1012

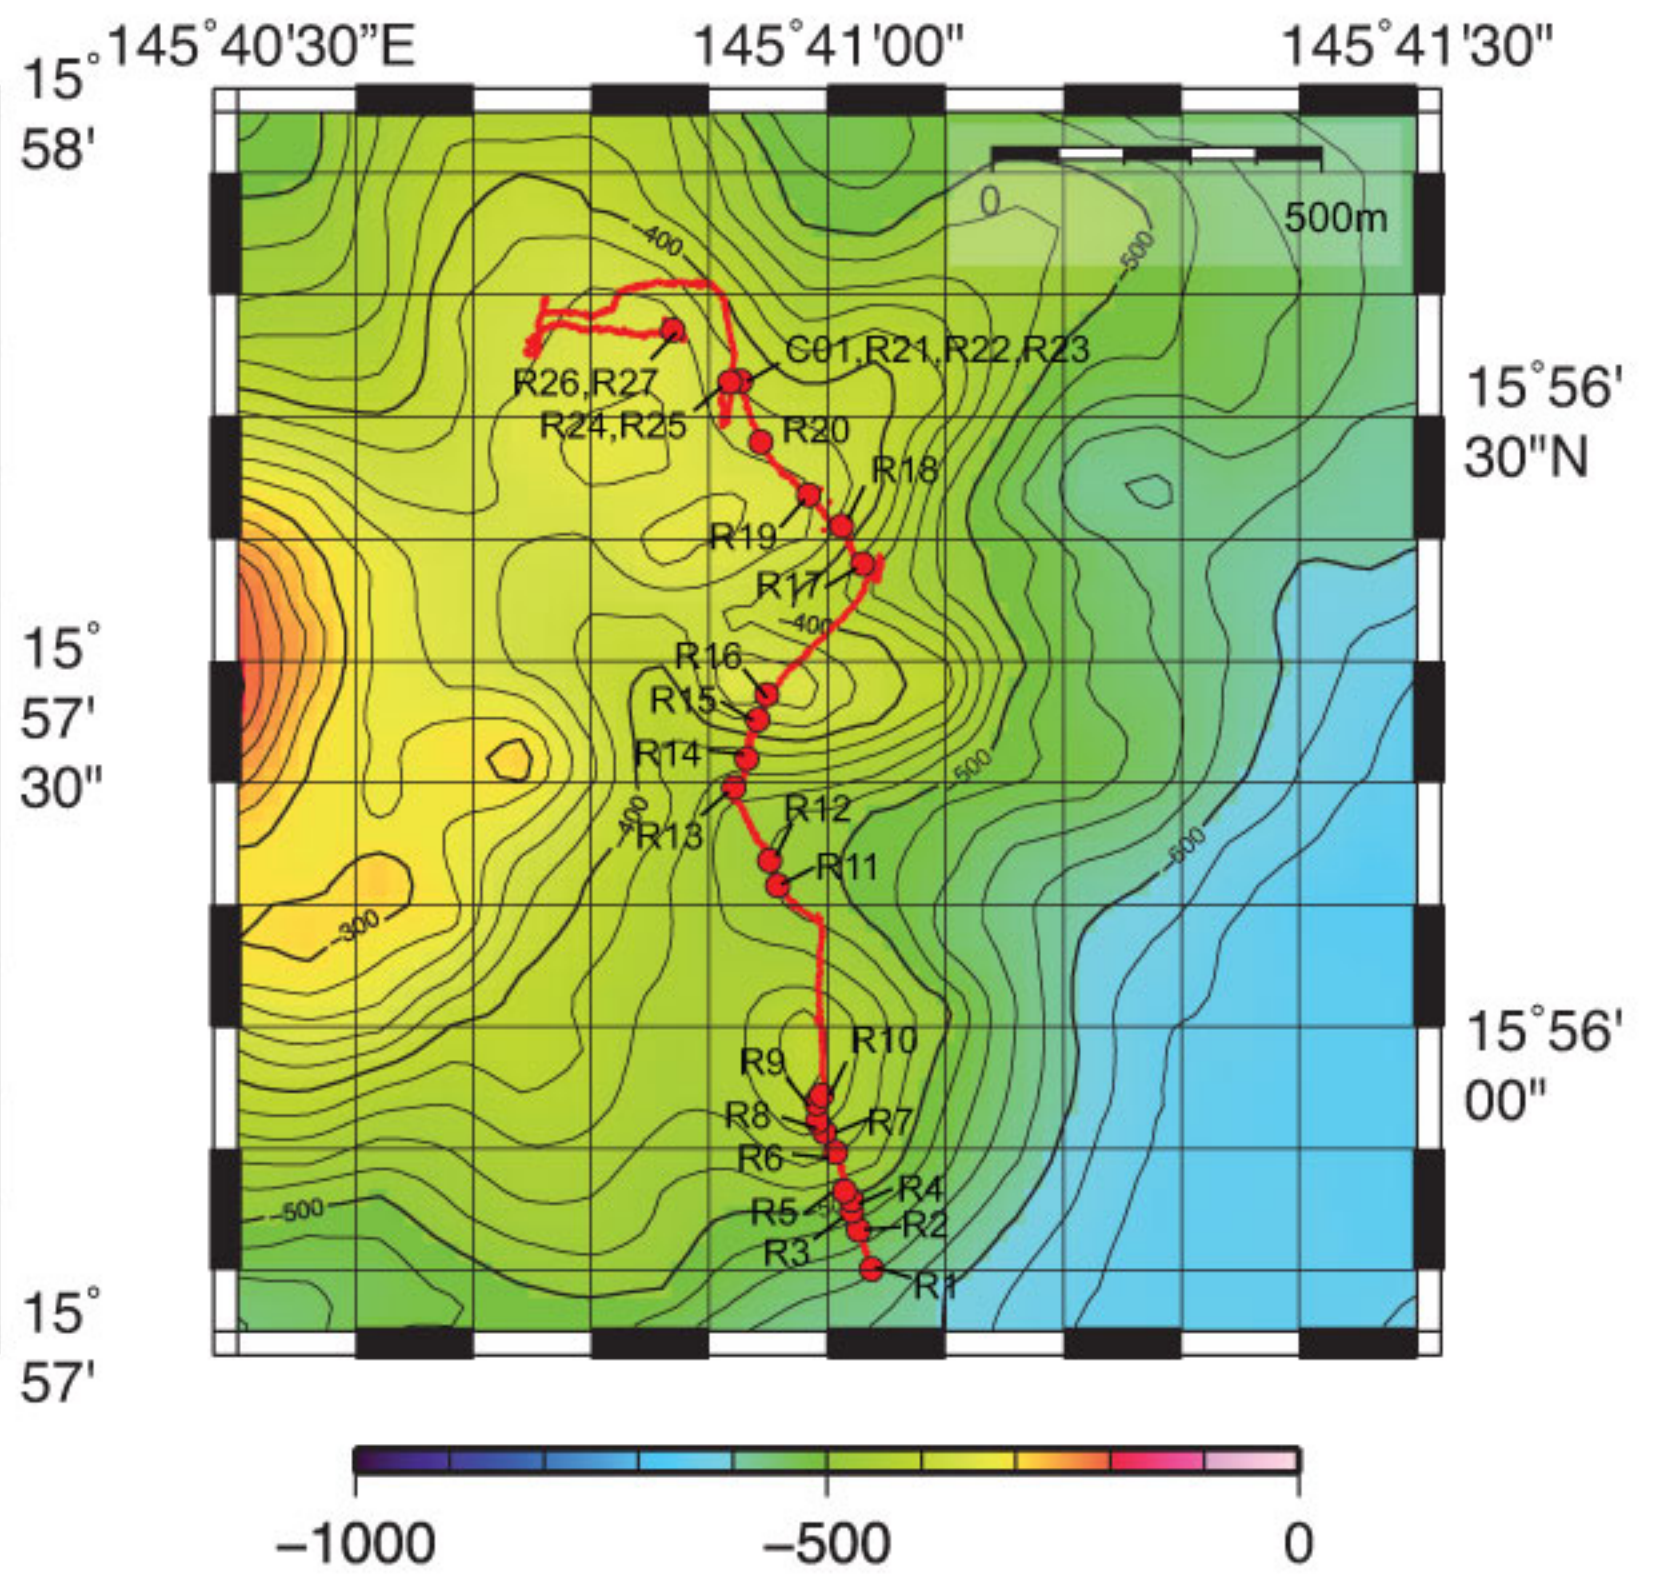

# HPD 1013

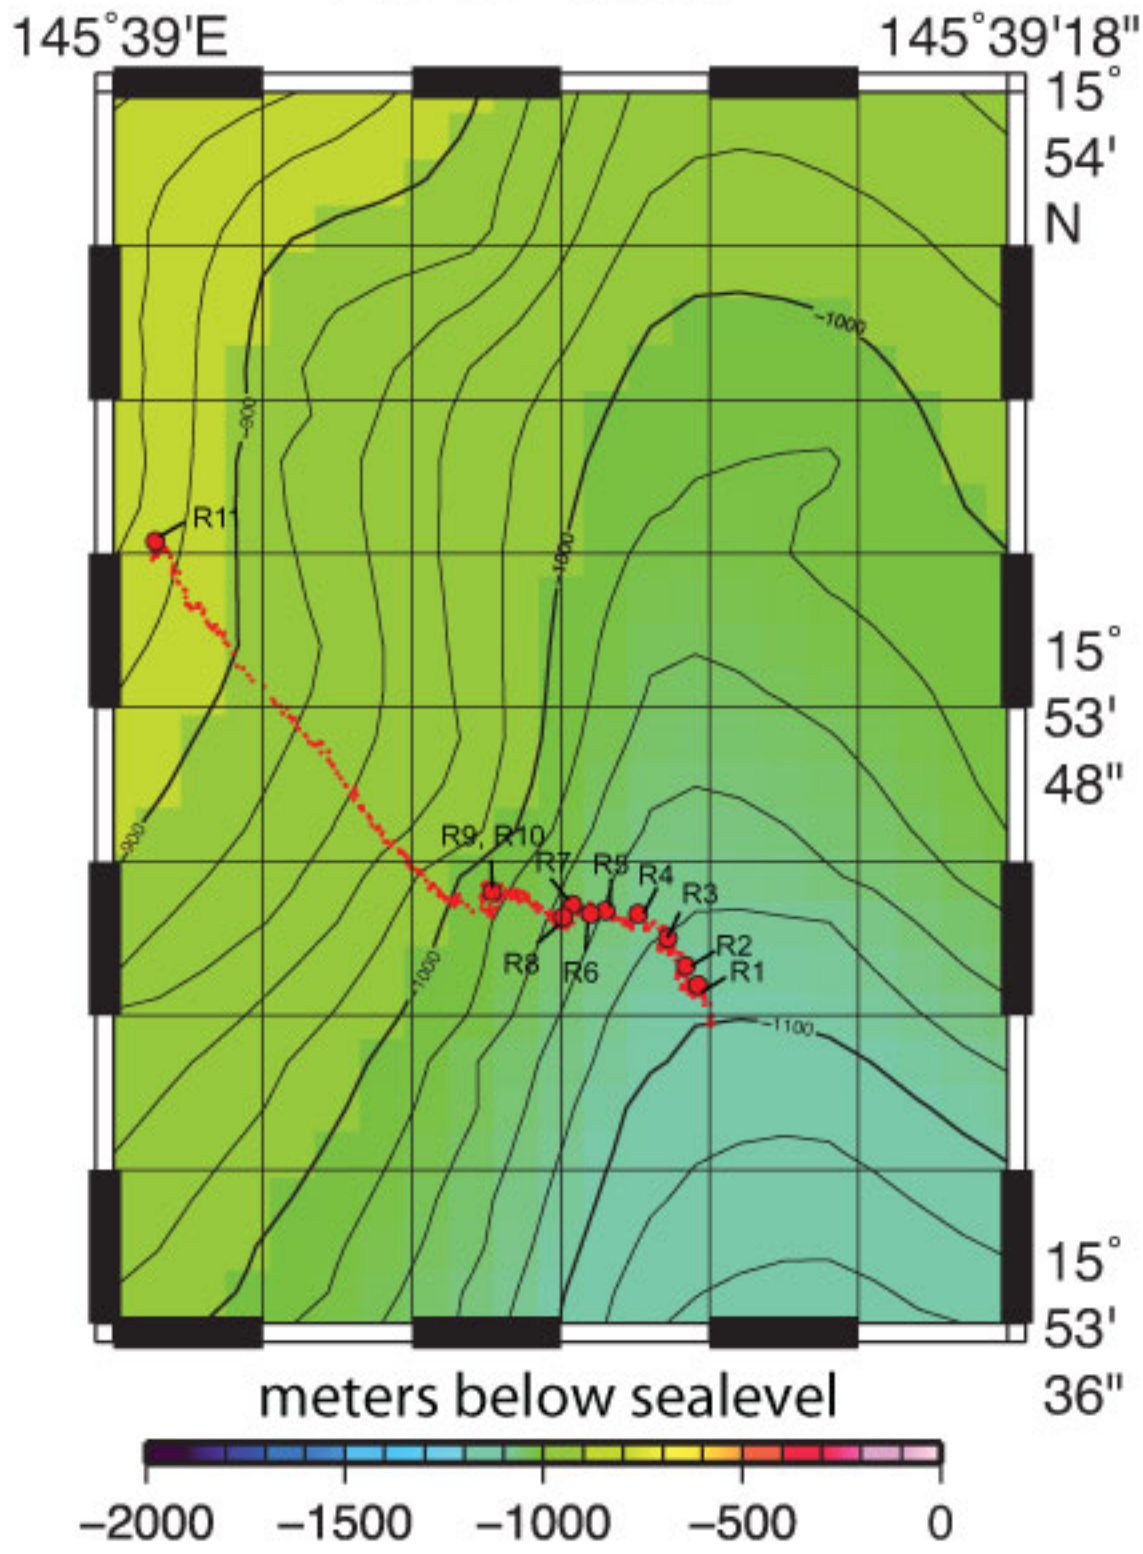

# HPD 1014

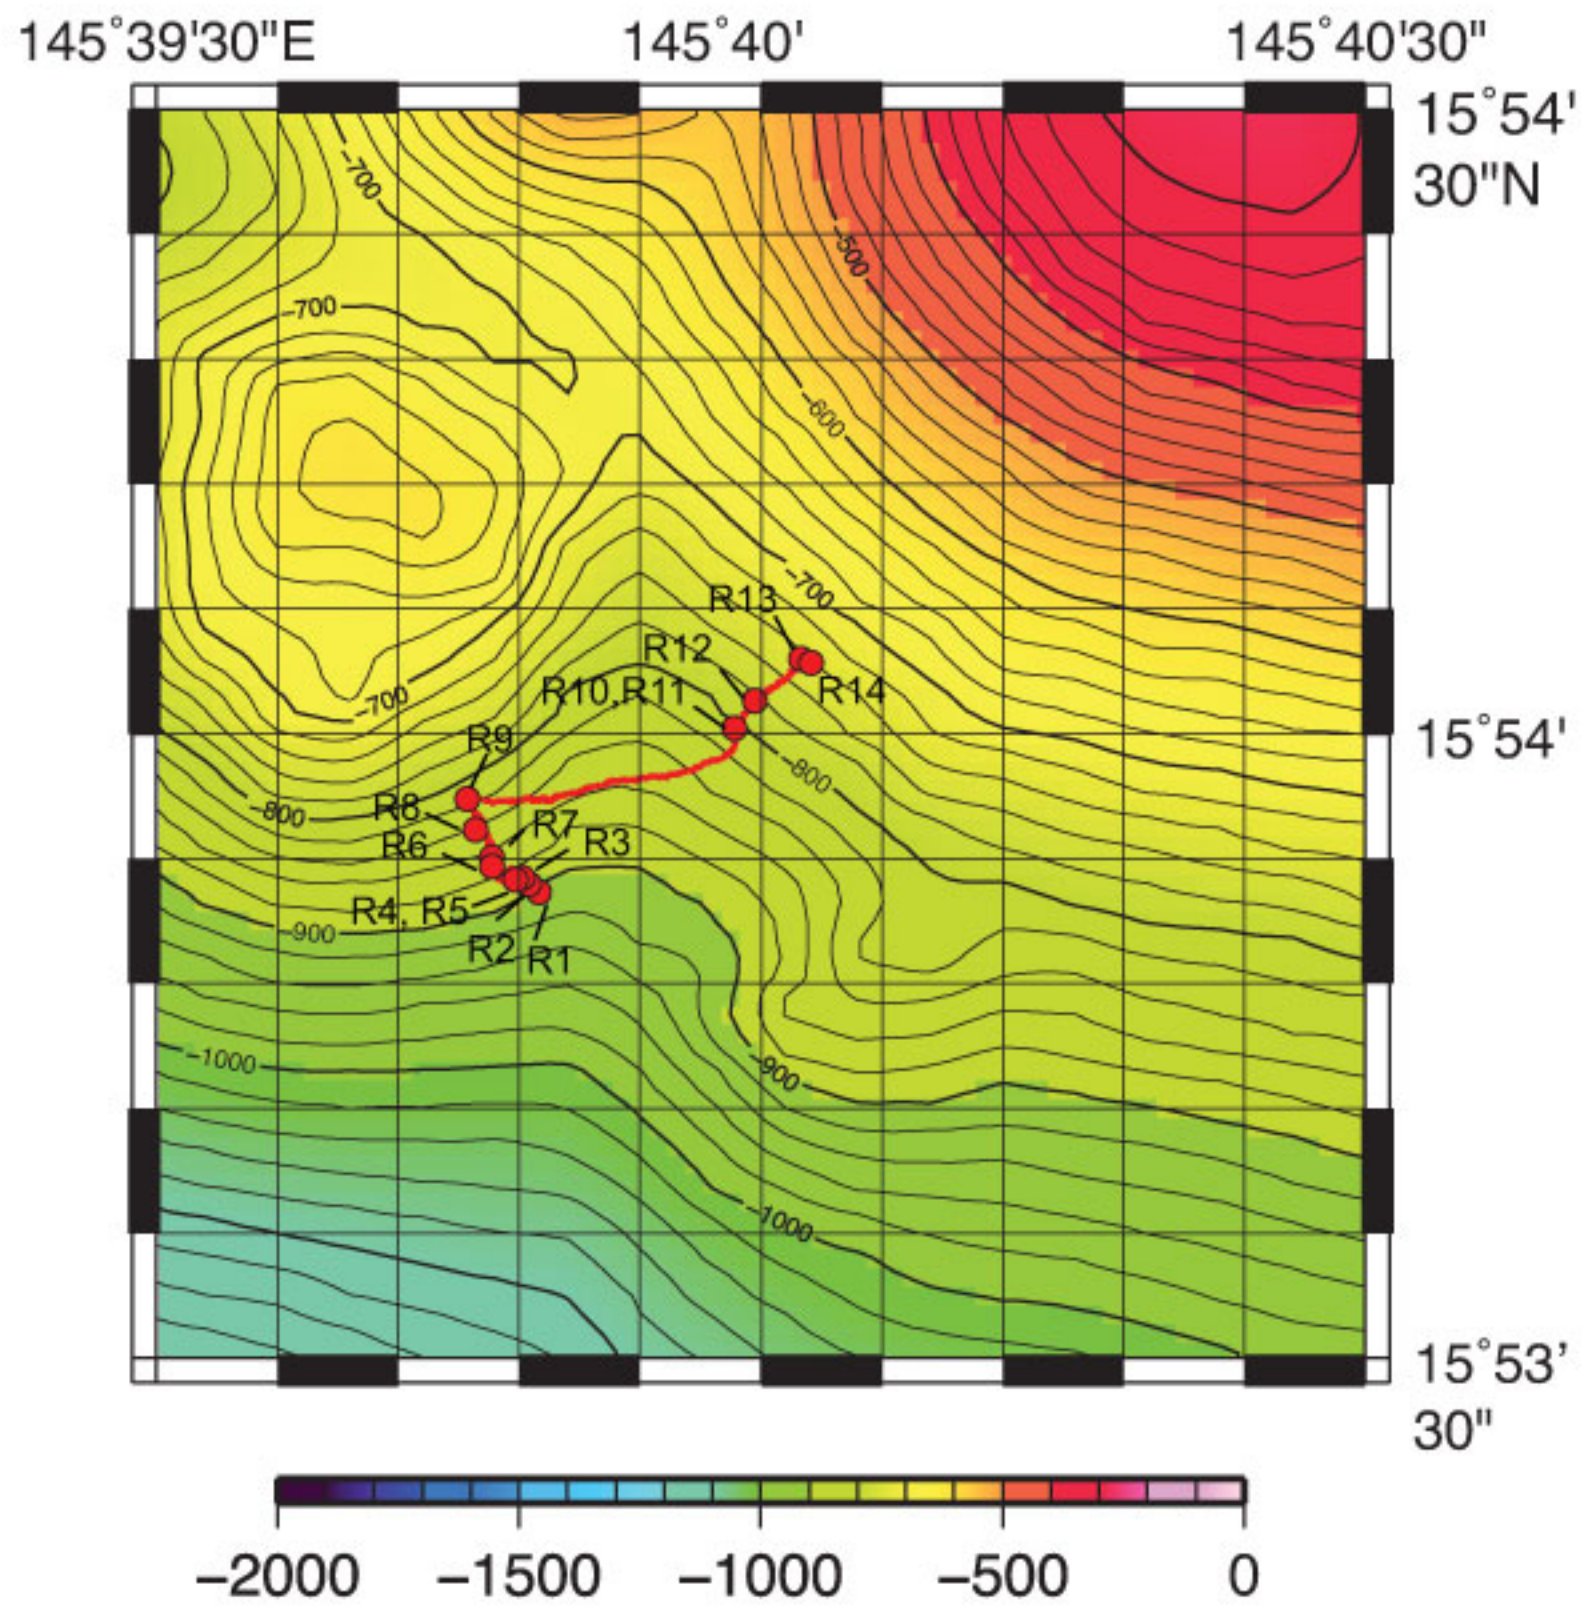

Figure A1A

Supplement: Supplementary file 3 [file 1]
